# Supplementary material
Source: publisher figshare collection journal article supplement (https://gsajournals.figshare.com/articles/dataset/_/12486482)
Supplement: Supplementary file 3 [file 1]

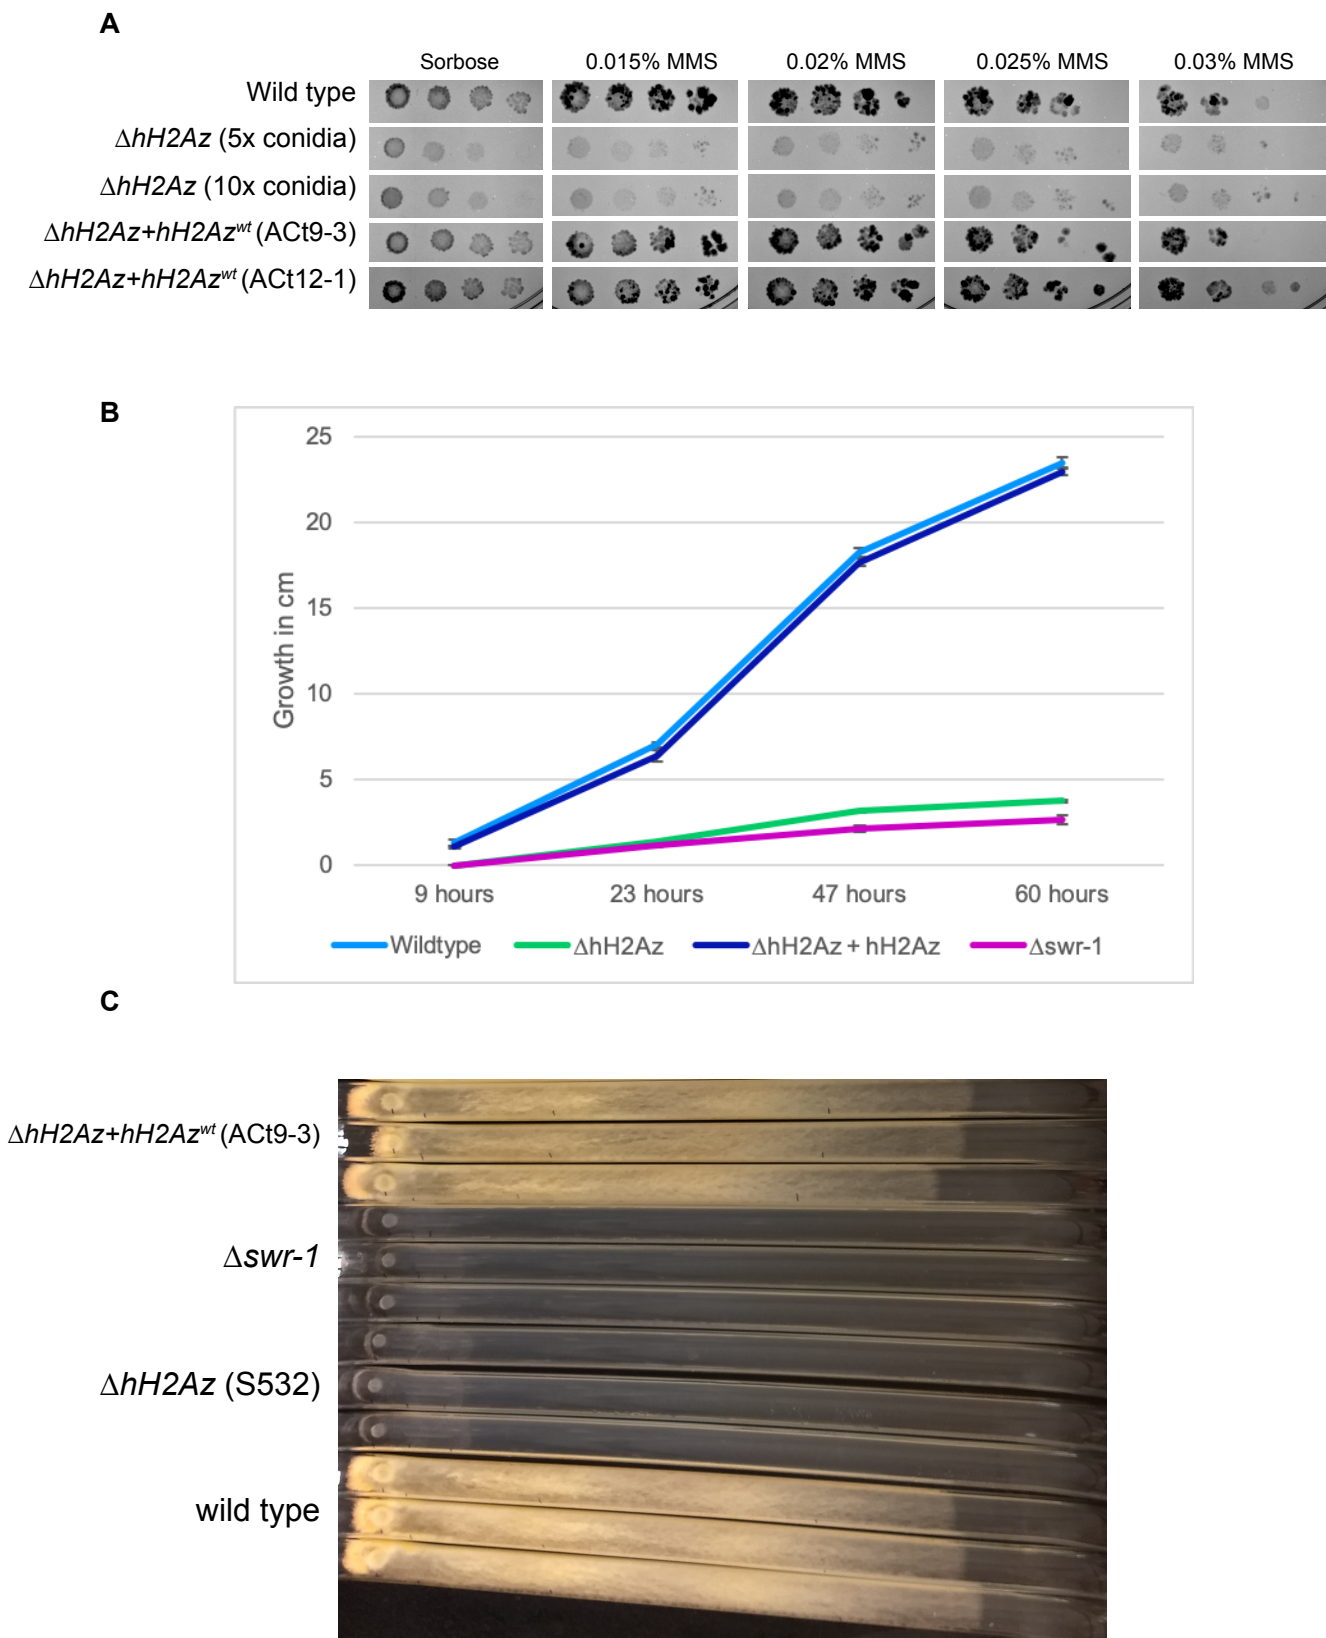

**Figure S3:  $\Delta hH2Az$  exhibits a slow growth phenotype and is hypersensitive to MMS**

A) MMS Spot test with increasing concentrations of MMS (5 and 10x more  $hH2Az$  (S532) conidia was used for growth comparable to wild type on sorbose) and decreasing concentrations of conidia.

B) Linear growth rate from race tubes from  $\Delta hH2Az+hH2Az^{wt}$  (ACT9-3),  $\Delta swr-1$ ,  $\Delta hH2Az$  (S532), and wild type in triplicate.

C) Image of race tubes growing strain in (B) in triplicate.
