# Supplementary material
Source: publisher figshare collection journal article supplement (https://gsajournals.figshare.com/articles/dataset/_/12486482)
Supplement: Supplementary file 4 [file 1]

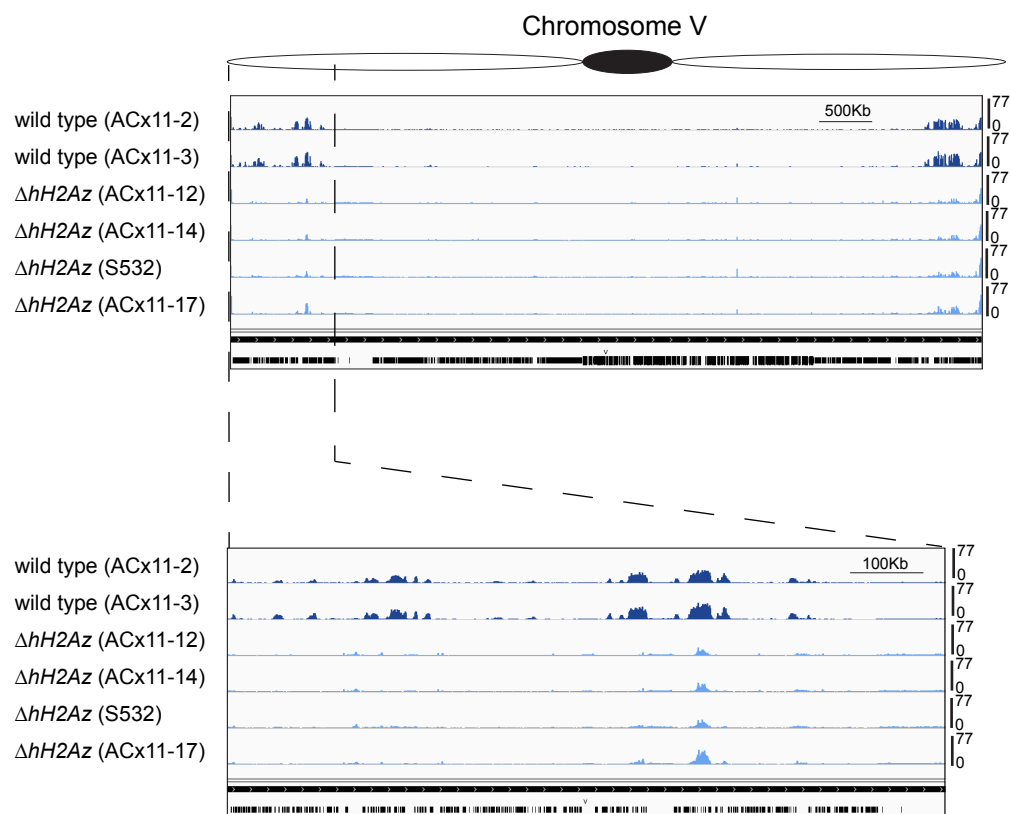

**Figure S2:  $\Delta hH2Az$  replicates demonstrating depletion of H3K27me2/3**  
 Genome browser images of two wild type progeny (top two tracks), and initial four backcrossed sibling *hH2Az* deletion strains on chromosome V. Segment shown at higher resolution to visualize loss of H3K27me2/3.
