# Supplementary material
Source: publisher figshare collection journal article supplement (https://gsajournals.figshare.com/articles/dataset/_/12486482)
Supplement: Supplementary file 6 [file 1]

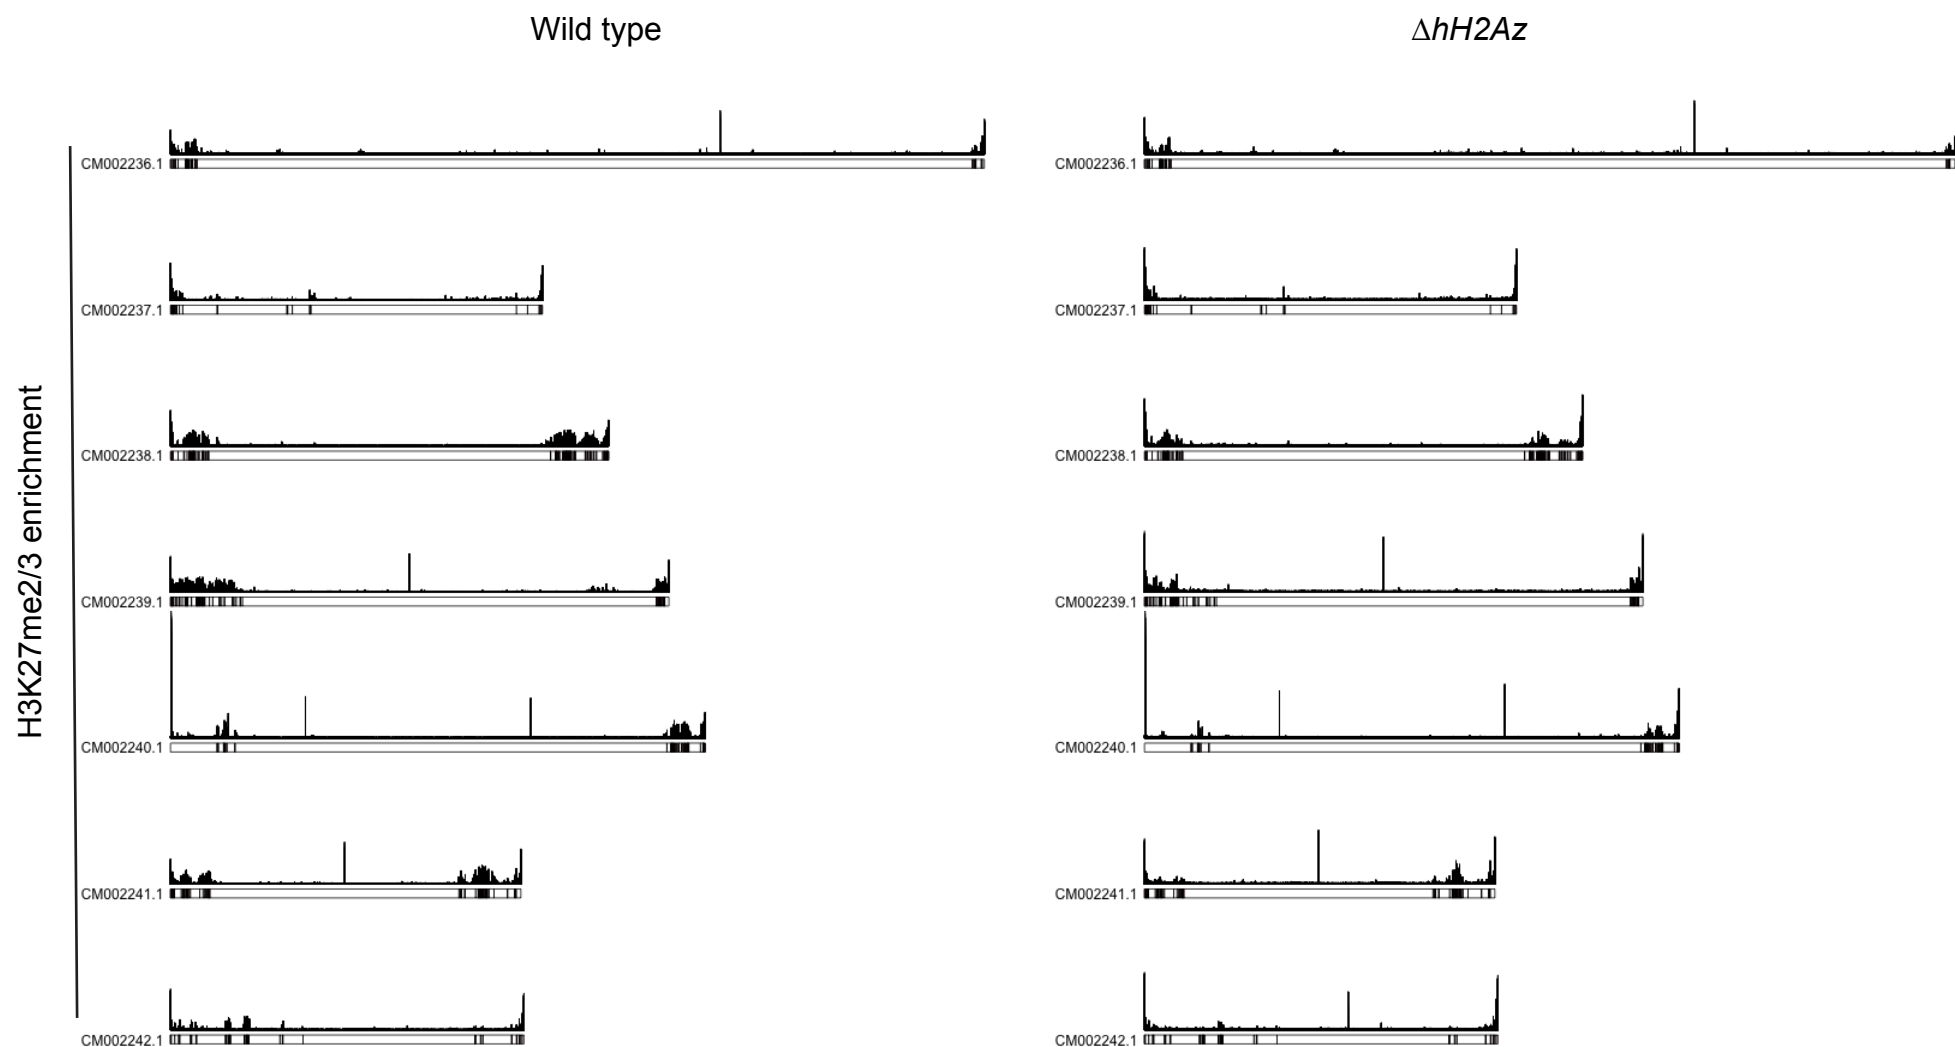

**Figure S1: Genome-wide distribution of H3K27me2/3 ChIP-seq**

Genome-wide distribution of ChIP-seq H3K27me2/3 enrichment in wild type (left) and  $\Delta hH2Az$  (right). Black lines below ChIP tracks are the location of the PRC2-target genes in each Linkage Group from I to VII (top to bottom).
