# Supplementary material
Source: publisher figshare collection journal article supplement (https://gsajournals.figshare.com/articles/dataset/_/12486482)
Supplement: Supplementary file 7 [file 1]

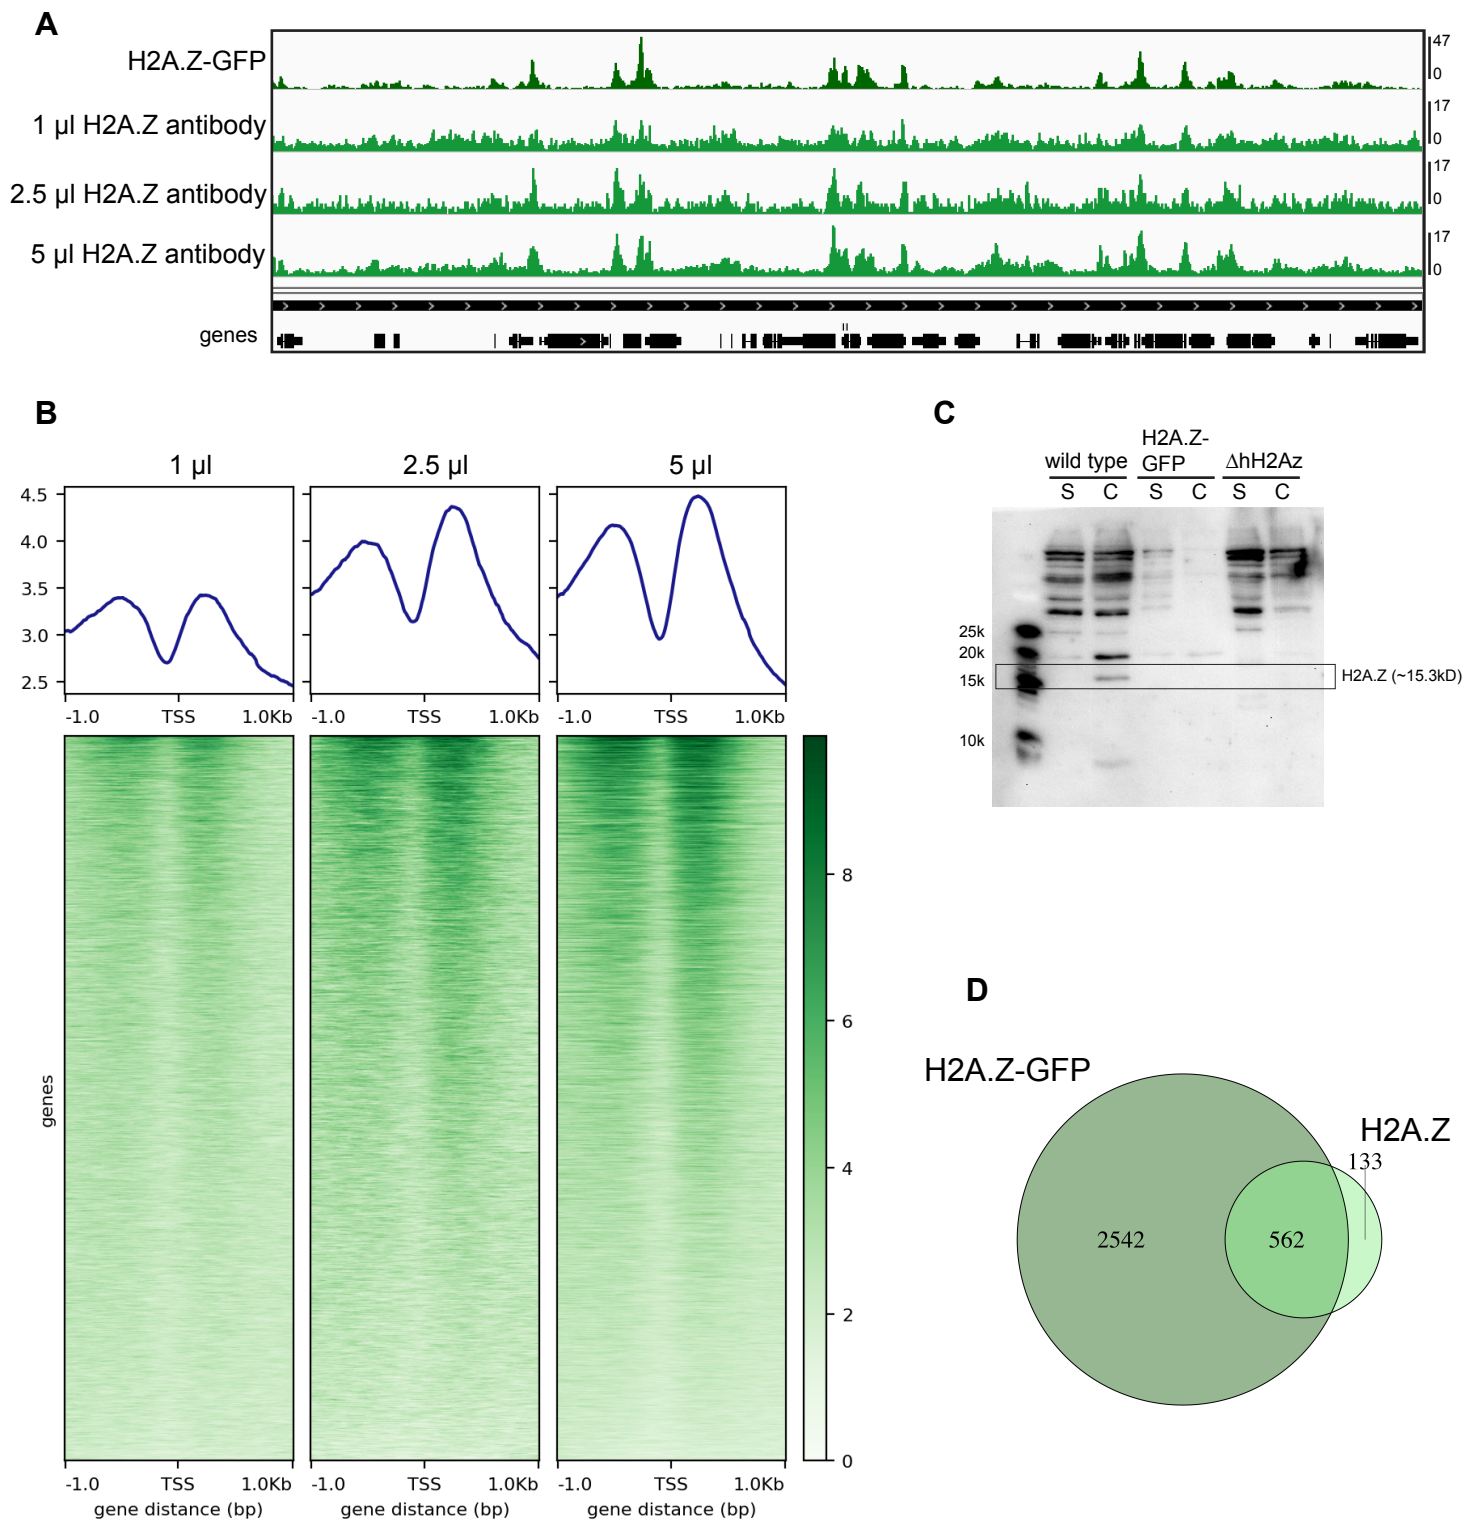

**Figure S6: Validation of H2A.Z-GFP enrichment**

A) Genome browser image of increasing amount of H2A.Z antibody (1 µL, 2.5 µL, 5 µL).

B) H2A.Z antibody ChIPs in wild type with increasing amounts of H2A.Z antibody. 5 µL is the optimal amount of the H2A.Z antibody to use for the highest resolution of H2A.Z enriched regions.

C) Venn diagram of peaks found with ChIP-seq using GFP antibody and H2A.Z antibody.

D) Western blot of chromatin (C) and soluble (S) fractions from wild type, H2A.Z-GFP and  $\Delta hH2Az$
