# Supplementary material
Source: publisher figshare collection journal article supplement (https://gsajournals.figshare.com/articles/dataset/_/12486482)

**A**

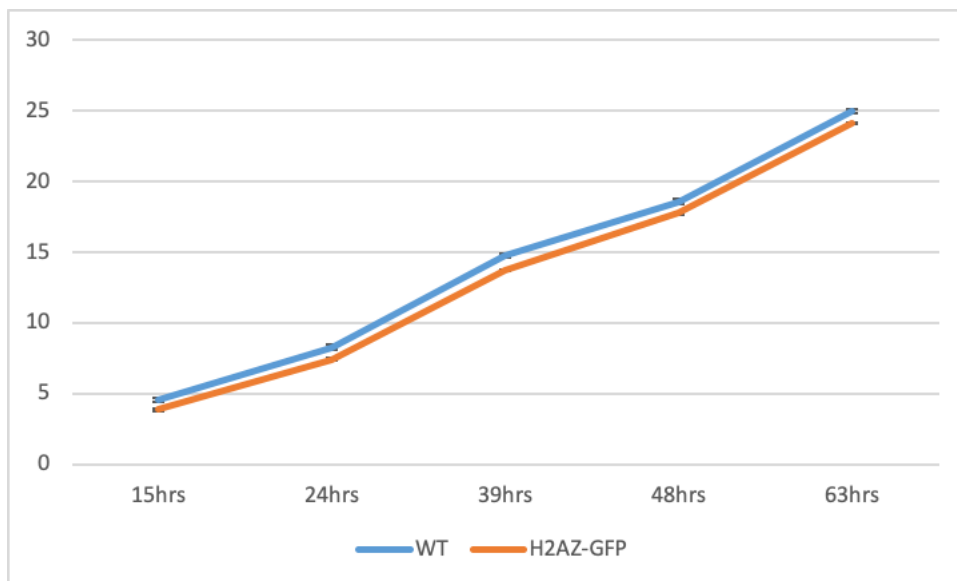

**B**

wild type

H2A.Z-GFP

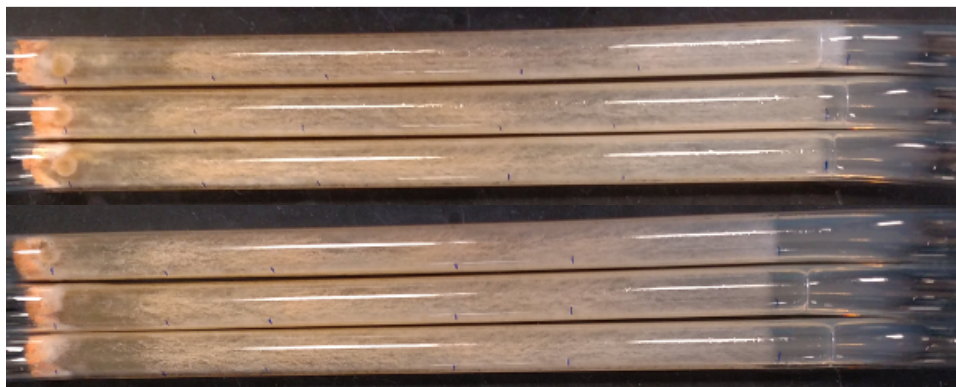

**Figure S5: Growth Rate of H2A.Z-GFP Strain is comparable to wild type**

Supplement: Supplementary file 1 [file 1]

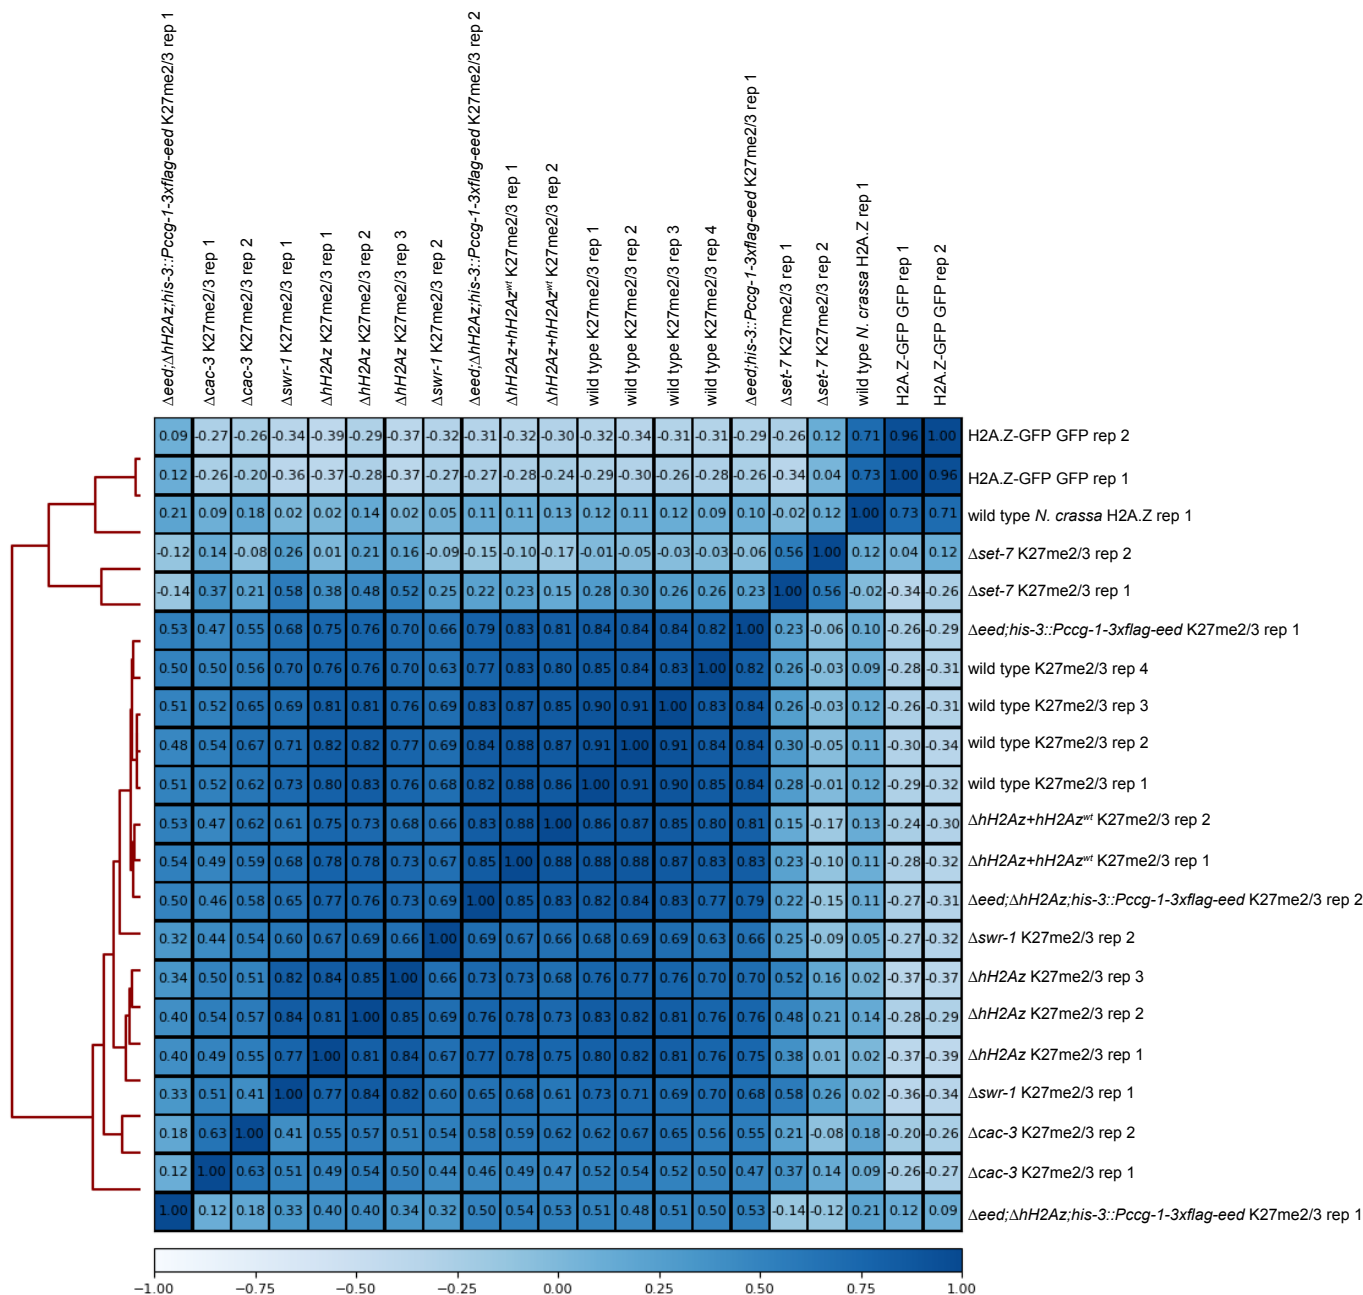

Supplement: Supplementary file 2 [file 1]
